# Supplementary material for: Impact Analysis of Photoperiodic Disorder on the Eyestalk of Chinese Mitten Crab (Eriocheir sinensis) through High-Throughput Sequencing Technology
Source: MDPI journal article supplement (doi:10.3390/life14020209), 2024-01-31
Supplement: s1 [file s1]

**Supplemental Table S3. Reference genomic information of *E. sinensis***

| <b>Database</b>    | <b>Num<br/>ber</b> | <b>Percentage</b> |
|--------------------|--------------------|-------------------|
| NR                 | 78701              | 41.62             |
| GO                 | 50358              | 26.63             |
| KEGG               | 36889              | 19.51             |
| eggNOG             | 67040              | 35.46             |
| Swissprot          | 51563              | 27.27             |
| In all<br>database | 32406              | 17.14             |
