# Supplementary material for: Impact Analysis of Photoperiodic Disorder on the Eyestalk of Chinese Mitten Crab (Eriocheir sinensis) through High-Throughput Sequencing Technology
Source: MDPI journal article supplement (doi:10.3390/life14020209), 2024-01-31
Supplement: s1 [file s1]

**Supplemental Table S2. Evaluation of RNA-Seq Data of *E. sinensis***

| <b>Sa<br/>mple</b> | <b>Clean Reads<br/>No.</b> | <b>Clean Data<br/>(bp)</b> | <b>Clean<br/>Reads %</b> | <b>Clean<br/>Data %</b> |
|--------------------|----------------------------|----------------------------|--------------------------|-------------------------|
| 2-E-<br>L-1        | 42,645,506                 | 6,396,825,900<br>.00       | 89.72                    | 89.72                   |
| 2-E-<br>L-2        | 45,663,482                 | 6,849,522,300<br>.00       | 89.38                    | 89.38                   |
| 2-E-<br>L-3        | 43,773,492                 | 6,566,023,800<br>.00       | 89.56                    | 89.56                   |
| 2-E-<br>D-1        | 41,342,194                 | 6,201,329,100<br>.00       | 91.48                    | 91.48                   |
| 2-E-<br>D-2        | 40,255,534                 | 6,038,330,100<br>.00       | 89.16                    | 89.16                   |
| 2-E-<br>D-3        | 44,907,644                 | 6,736,146,600<br>.00       | 89.86                    | 89.86                   |
| 2-E-<br>N-1        | 44,640,118                 | 6,696,017,700<br>.00       | 89.60                    | 89.60                   |
| 2-E-<br>N-2        | 41,815,266                 | 6,272,289,900<br>.00       | 89.90                    | 89.90                   |
| 2-E-<br>N-3        | 36,867,796                 | 5,530,169,400<br>.00       | 89.97                    | 89.97                   |
| 4-E-<br>L-1        | 43,129,466                 | 6,469,419,900<br>.00       | 88.95                    | 88.95                   |
| 4-E-<br>L-2        | 41,372,870                 | 6,205,930,500<br>.00       | 89.36                    | 89.36                   |
| 4-E-<br>L-3        | 40,537,772                 | 6,080,665,800<br>.00       | 90.89                    | 90.89                   |
| 4-E-<br>D-1        | 45,863,414                 | 6,879,512,100<br>.00       | 90.33                    | 90.33                   |
| 4-E-<br>D-2        | 40,072,550                 | 6,010,882,500<br>.00       | 89.41                    | 89.41                   |
| 4-E-<br>D-3        | 40,259,978                 | 6,038,996,700<br>.00       | 76.42                    | 76.42                   |
| 4-E-<br>N-1        | 37,907,576                 | 5,686,136,400<br>.00       | 87.97                    | 87.97                   |

|             |            |                      |       |       |
|-------------|------------|----------------------|-------|-------|
| 4-E-<br>N-2 | 40,516,880 | 6,077,532,000<br>.00 | 89.14 | 89.14 |
| 4-E-<br>N-3 | 41,710,084 | 6,256,512,600<br>.00 | 89.65 | 89.65 |
| 6-E-<br>L-1 | 38,398,750 | 5,759,812,500<br>.00 | 87.82 | 87.82 |
| 6-E-<br>L-2 | 36,075,812 | 5,411,371,800<br>.00 | 89.13 | 89.13 |
| 6-E-<br>L-3 | 35,718,558 | 5,357,783,700<br>.00 | 78.89 | 78.89 |
| 6-E-<br>D-1 | 40,708,160 | 6,106,224,000<br>.00 | 88.89 | 88.89 |
| 6-E-<br>D-2 | 38,666,090 | 5,799,913,500<br>.00 | 90.82 | 90.82 |
| 6-E-<br>D-3 | 41,046,054 | 6,156,908,100<br>.00 | 90.00 | 90.00 |
| 6-E-<br>N-1 | 39,496,764 | 5,924,514,600<br>.00 | 89.82 | 89.82 |
| 6-E-<br>N-2 | 42,030,634 | 6,304,595,100<br>.00 | 89.79 | 89.79 |
| 6-E-<br>N-3 | 44,162,904 | 6,624,435,600<br>.00 | 89.47 | 89.47 |

---
