# Supplementary material for: Impact Analysis of Photoperiodic Disorder on the Eyestalk of Chinese Mitten Crab (Eriocheir sinensis) through High-Throughput Sequencing Technology
Source: MDPI journal article supplement (doi:10.3390/life14020209), 2024-01-31
Supplement: s1 [file s1]

**Supplemental Table S1. The summary information of transcriptomic sequences**

| <b>Sample</b> | <b>Reads No.</b> | <b>Bases (bp)</b> | <b>Q20 (%)</b> | <b>Q30 (%)</b> |
|---------------|------------------|-------------------|----------------|----------------|
| 2-E-L-1       | 47,531,556       | 7,129,733,400     | 96.70          | 92.12          |
| 2-E-L-2       | 51,086,712       | 7,663,006,800     | 96.41          | 91.57          |
| 2-E-L-3       | 48,875,700       | 7,331,355,000     | 95.90          | 90.64          |
| 2-E-D-1       | 45,190,922       | 6,778,638,300     | 96.65          | 92.00          |
| 2-E-D-2       | 45,148,566       | 6,772,284,900     | 96.53          | 91.88          |
| 2-E-D-3       | 49,970,130       | 7,495,519,500     | 97.02          | 92.66          |
| 2-E-N-1       | 49,819,870       | 7,472,980,500     | 96.63          | 91.95          |
| 2-E-N-2       | 46,510,268       | 6,976,540,200     | 96.75          | 92.08          |
| 2-E-N-3       | 40,975,142       | 6,146,271,300     | 96.71          | 92.05          |
| 4-E-L-1       | 48,486,932       | 7,273,039,800     | 96.50          | 91.64          |
| 4-E-L-2       | 46,297,908       | 6,944,686,200     | 96.61          | 91.92          |
| 4-E-L-3       | 44,600,702       | 6,690,105,300     | 96.63          | 91.91          |
| 4-E-D-1       | 50,772,066       | 7,615,809,900     | 96.79          | 92.21          |
| 4-E-D-2       | 44,818,322       | 6,722,748,300     | 96.44          | 91.63          |
| 4-E-D-3       | 52,678,496       | 7,901,774,400     | 96.77          | 92.31          |
| 4-E-N-1       | 43,086,798       | 6,463,019,700     | 96.82          | 92.35          |
| 4-E-N-2       | 45,452,204       | 6,817,830,600     | 96.79          | 92.22          |
| 4-E-N-3       | 46,520,634       | 6,978,095,100     | 96.60          | 91.89          |
| 6-E-L-1       | 43,720,684       | 6,558,102,600     | 96.20          | 91.18          |
| 6-E-L-2       | 40,473,144       | 6,070,971,600     | 96.39          | 91.46          |
| 6-E-L-3       | 45,273,738       | 6,791,060,700     | 96.69          | 92.01          |
| 6-E-D-1       | 45,794,100       | 6,869,115,000     | 96.08          | 90.89          |
| 6-E-D-2       | 42,571,902       | 6,385,785,300     | 96.51          | 91.66          |
| 6-E-D-3       | 45,602,772       | 6,840,415,800     | 96.34          | 91.49          |
| 6-E-N-1       | 43,973,142       | 6,595,971,300     | 96.67          | 92.06          |
| 6-E-N-2       | 46,805,456       | 7,020,818,400     | 96.58          | 91.95          |
| 6-E-N-3       | 49,358,704       | 7,403,805,600     | 96.25          | 91.34          |
