# Supplementary figures and images for: Impact Analysis of Photoperiodic Disorder on the Eyestalk of Chinese Mitten Crab (Eriocheir sinensis) through High-Throughput Sequencing Technology
Source: MDPI journal article supplement (doi:10.3390/life14020209), 2024-01-31

A

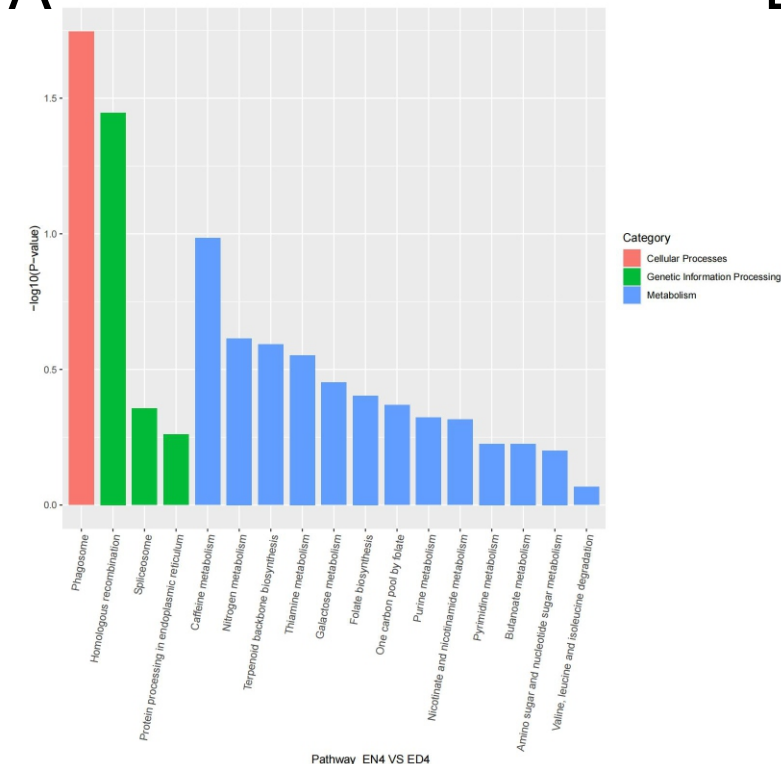

B

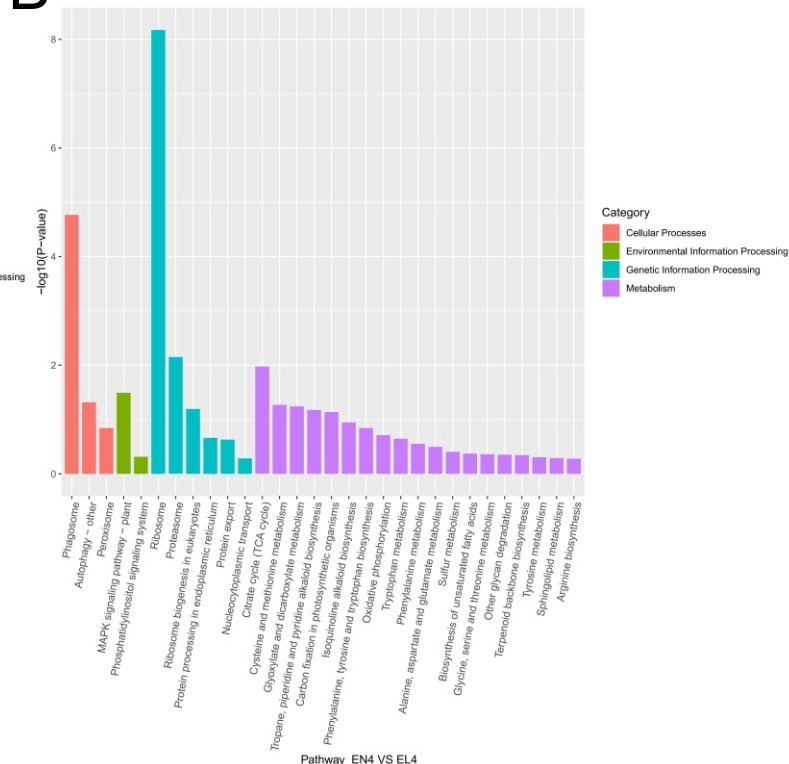

C

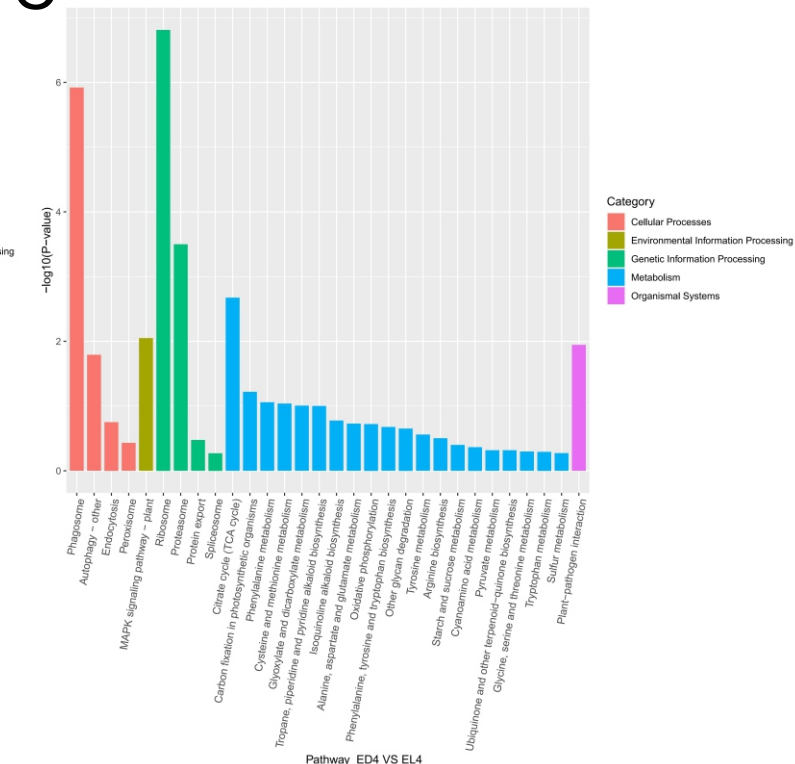

Supplement: s1 [file s1]

A

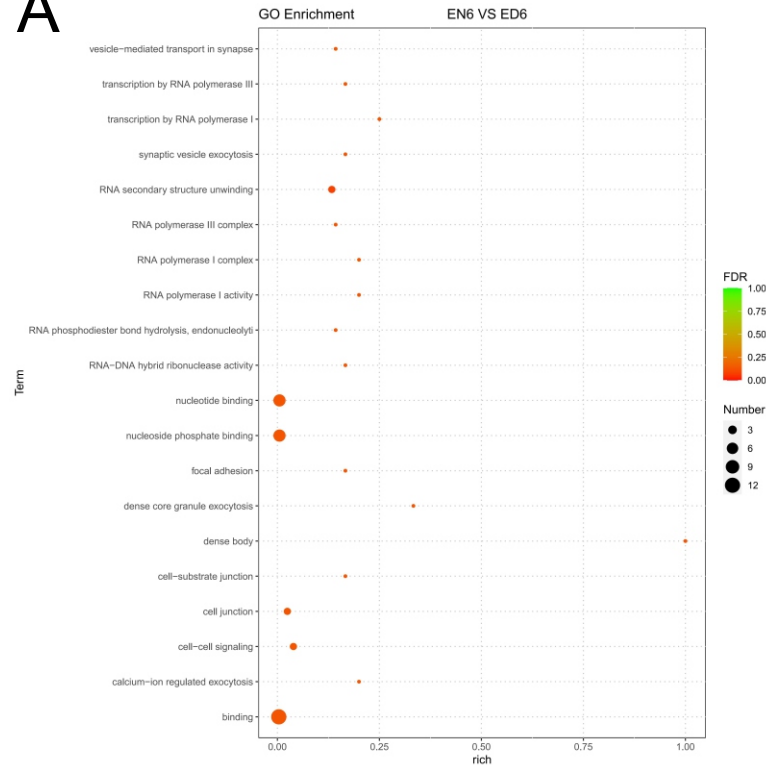

B

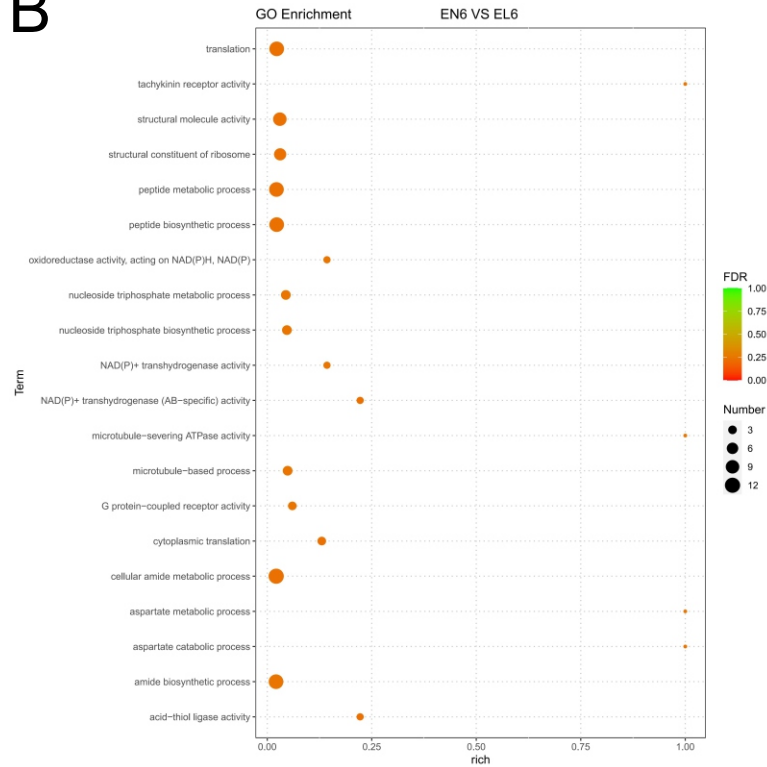

C

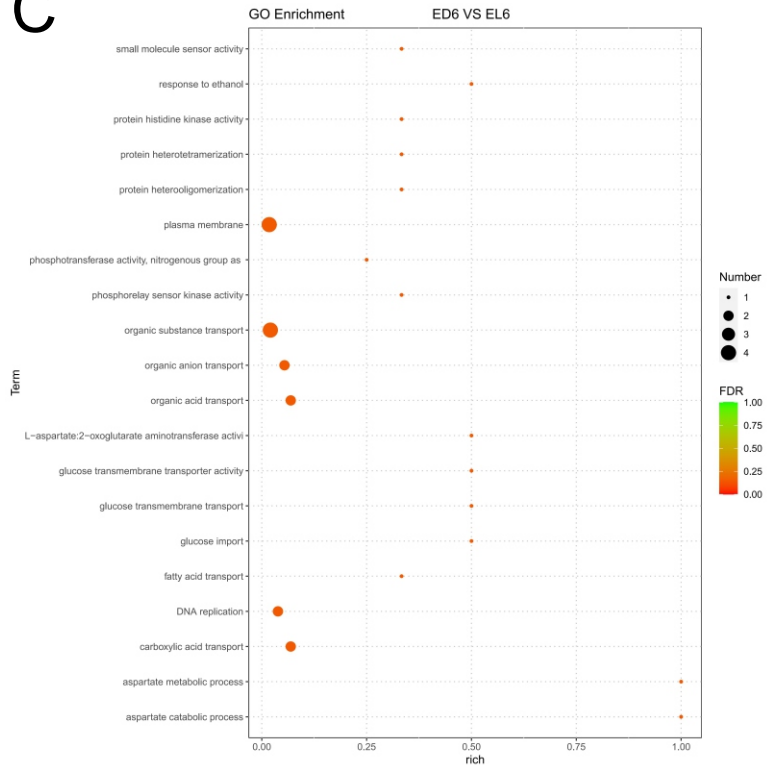

Supplement: s1 [file s1]

A

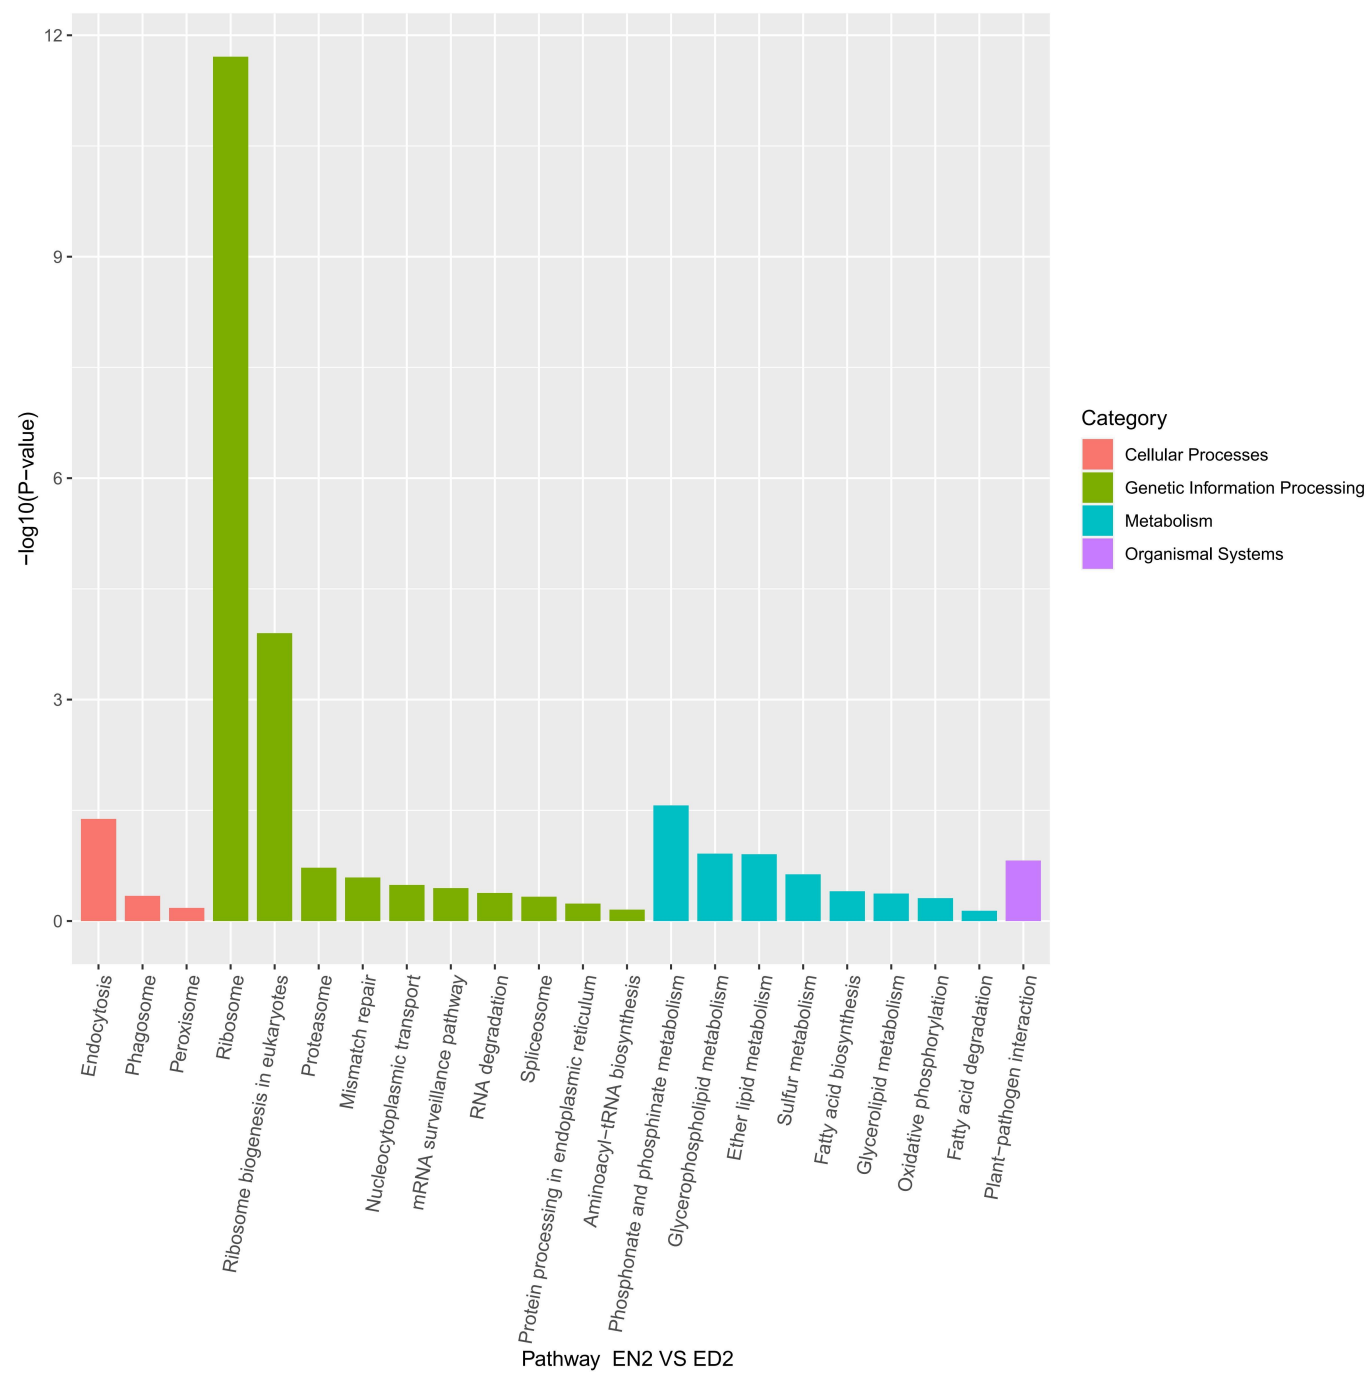

B

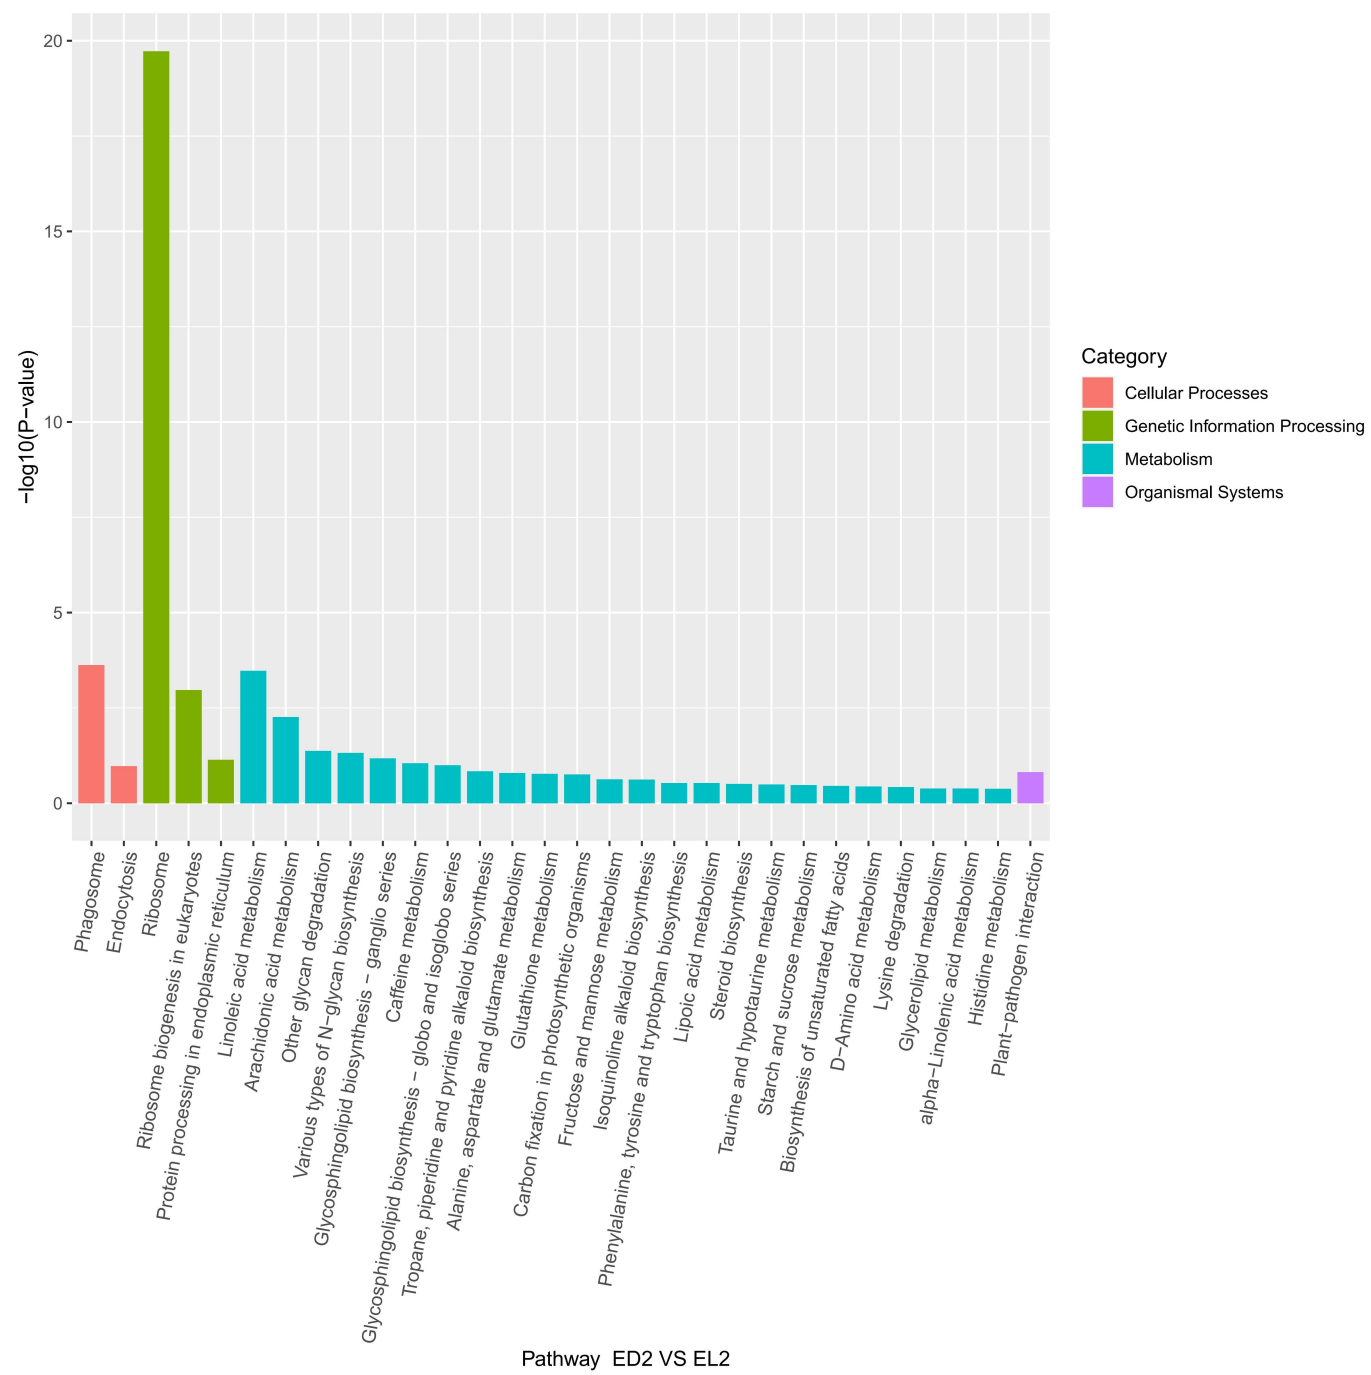

Supplement: s1 [file s1]

A

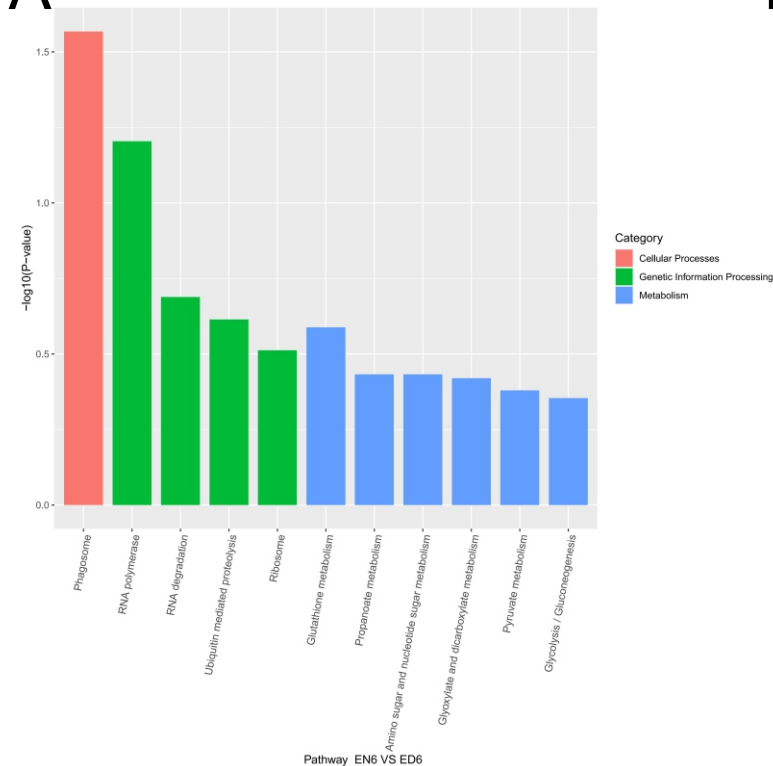

B

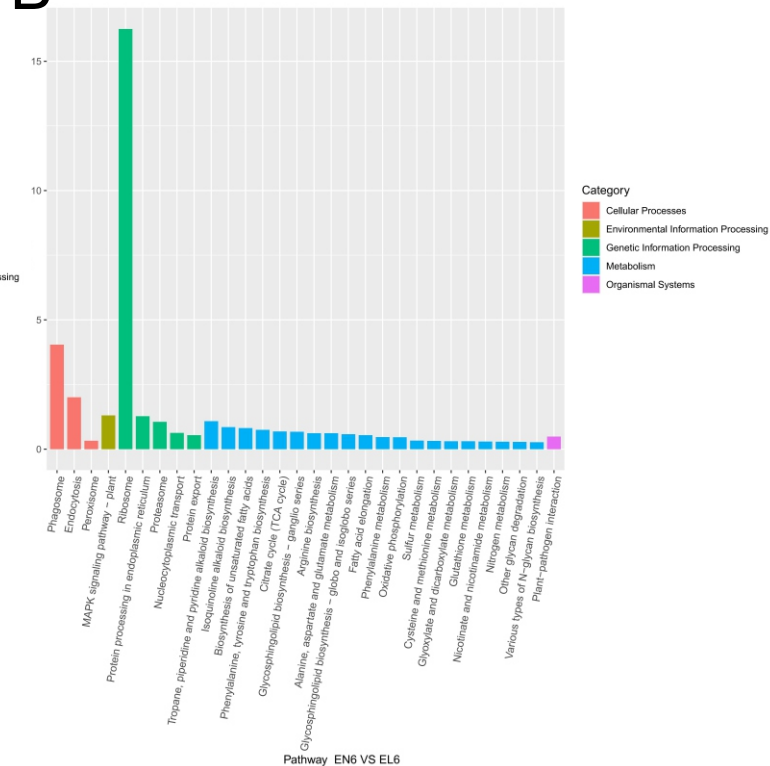

C

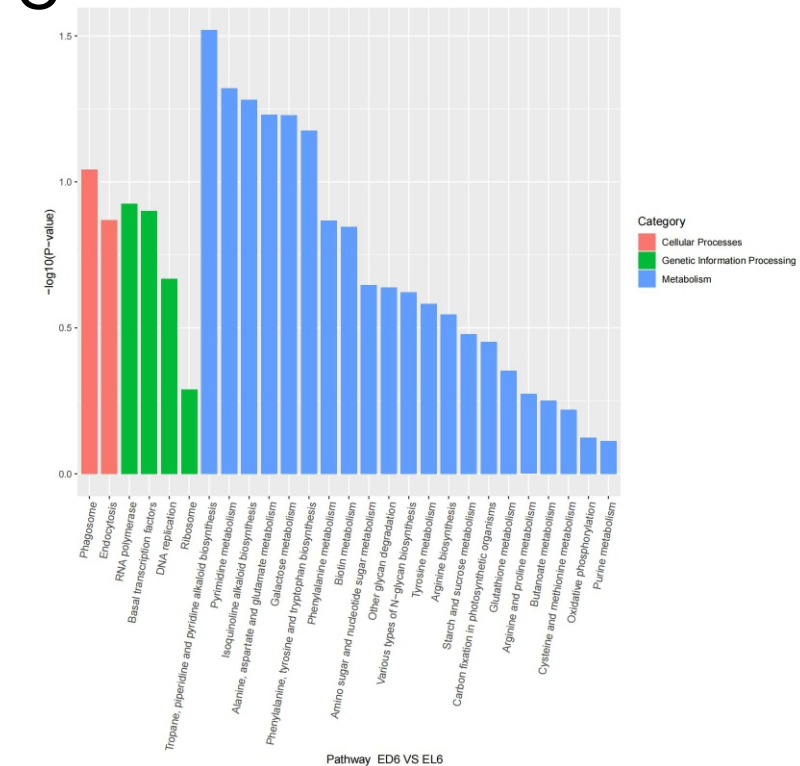

Supplement: s1 [file s1]
